# Supplementary material for: Unravelling the crystallization mechanism and structural evolution of Yb/Er-doped SiO2-GdF3 nano-glass ceramics
Source: Royal Society of Chemistry journal article supplement (doi:10.1039/d5ma00377f), 2025-01-01
Supplement: d5ma00377f1.pdf [file d5ma00377f1.pdf]

## Supplementary material

### 1. Synthesis of the 18Yb/2Er-doped NaYF<sub>4</sub> nanocrystals

The NaYF<sub>4</sub>: Yb<sup>3+</sup>(18 mol%)/Er<sup>3+</sup>(2 mol%), nanocrystalline powder of around 50-60nm size sample were prepared by using a hybrid sol-gel/thermal decomposition route outlined in: C. Bartha, C. E. Secu, E. Matei, M. Secu, Crystallization kinetics mechanism investigation of sol-gel-derived NaYF<sub>4</sub>:(Yb,Er) up-converting phosphors, **Cryst. Eng. Comm.** **19** (2017) 4992-5000.

### 2. X-ray Diffraction

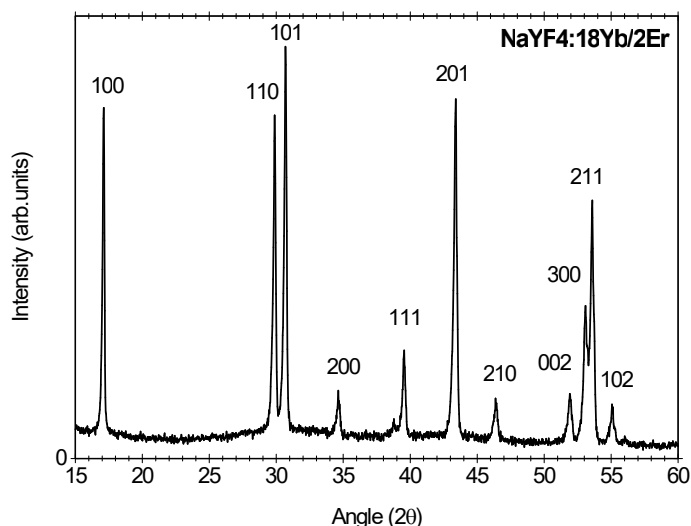

**Figure** XRD pattern of the β-NaYF<sub>4</sub>: Yb<sup>3+</sup>(18 mol%)/Er<sup>3+</sup>(2 mol%) nanocrystals (JCPDS 28-1192) obtained after calcination at T=500 °C with the peaks assignment.

### 3. Optical reflectance

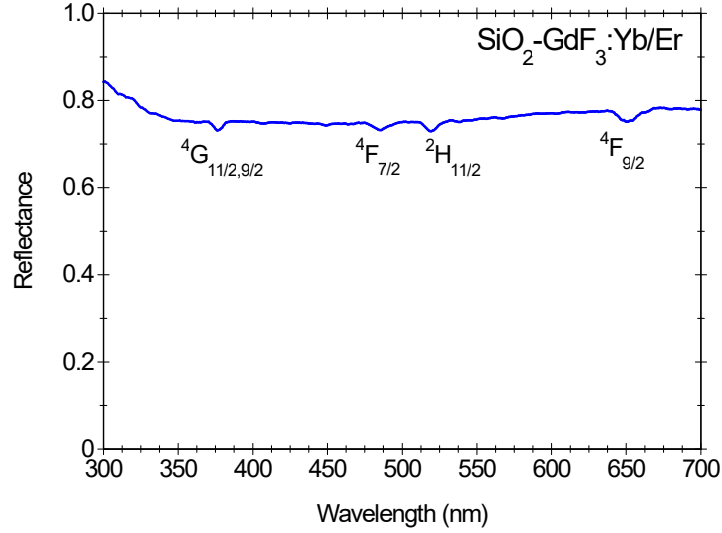

**Figure** Reflectance spectrum recorded on GCLiYb/Er glass ceramic (after 525 °C annealing)

### 4. UP-conversion luminescence

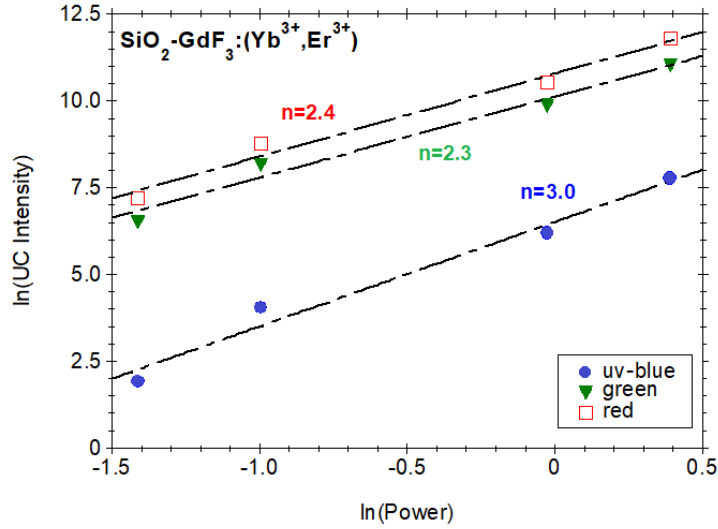

**Figure.** Double logarithmic plot of luminescence intensity vs. incident laser power for the uv-blue ( $^2H_{9/2} \rightarrow ^4I_{15/2}$ ), green ( $(^2H_{11/2}, ^4S_{3/2}) \rightarrow ^4I_{15/2}$ ) and red ( $^4F_{9/2} \rightarrow ^4I_{15/2}$ ) UC luminescences.

The quantitative measurement of absolute quantum yield QY of the up-conversion were performed by using the method proposed by J.C. Boyer et al. [35] - the measurements set-up is shown below. For the UC luminescence excitation, we used a 200 mW laser module centered at 980nm, focused to a spot of about 2 mm<sup>2</sup>. The luminescence signal was acquired by using a 50mm diameter Thorlab integrating sphere coupled to a commercial spectrophotometer (Ocean Optics usb2000) sensitive in the 370-1050 nm spectral range, through an optical fiber. The absolute quantum yield QY is given by “QY=L<sub>sample</sub>/(E<sub>reference</sub> -E<sub>sample</sub>)”, where L<sub>sample</sub> is the emission intensity of the sample and

$E_{\text{reference}}$  and  $E_{\text{sample}}$  are the intensities of the excitation light recorded on the reference and sample, respectively [34].

We obtained QY of  $0.2 \pm 0.1\%$  for GCLiYb/Er glass ceramic and  $0.3 \pm 0.1\%$  for the  $\beta$ -NaYF<sub>4</sub>:18Yb/2Er.

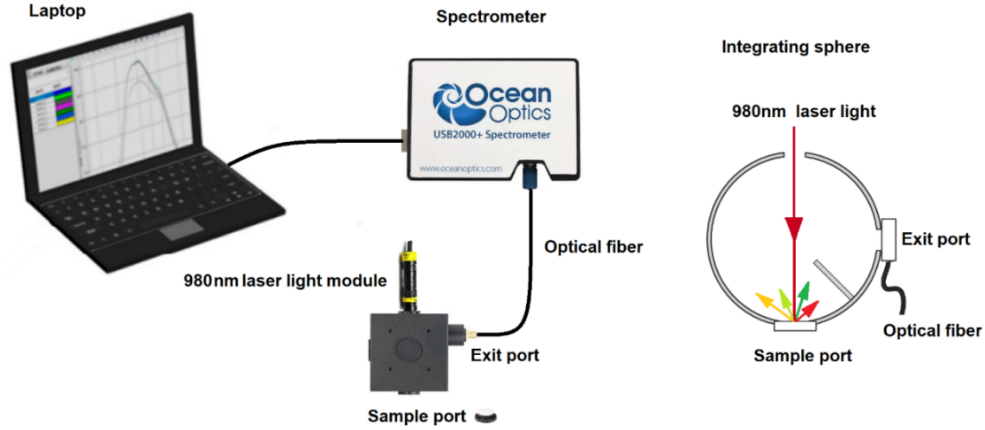

**Figure** The scheme of the experimental set-up used for the UC luminescence efficiency QY measurements.

#### 4. Colorimetry analysis

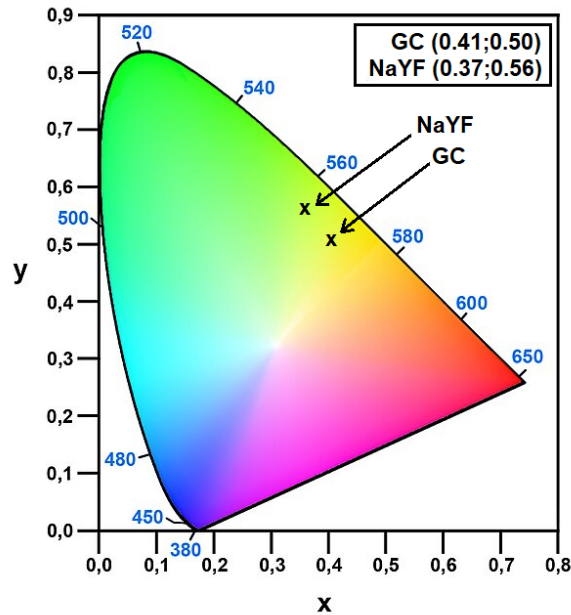

**Figure** The chromaticity coordinates according to the Commission Internationale de l'Eclairage (CIE) 1931 chromaticity diagram

The colorimetry analysis showed different slightly different parameters due to the stronger “red” luminescence component shown by GCLiYb/Er compared to the  $\beta$ -NaYF<sub>4</sub>:18Yb/2Er phosphor.
